# Supplementary material
Source: Springer Nature journal article supplement (https://www.springermedizin.de/resource/supplementary/12888_2009_663_MOESM8_ESM.pdf/9478092)

**Subgroup within study****Study name****Statistics for each study****Events / Total****Odds ratio and 95% CI**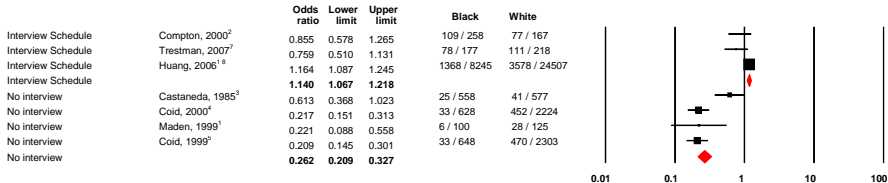

Supplement: MOESM8 [file 9478092]
